# Supplementary material for: Brain Structure Abnormalities in Early-Onset and Adolescent-Onset Conduct Disorder
Source: Atypon-hosted journal article supplement (doi:10.1176/appi.ajp.2010.10081184), 2011-04-02
Supplement: ajp_168_06_624_01.pdf [file ajp_168_06_624_01.pdf]

**Table S1: Brain regions showing a main effect of group on gray matter volume**

| Cerebral regions          | Hemisphere | Local Maxima,<br>F | Number of significant<br>voxels in cluster | MNI Coordinates |     |     |
|---------------------------|------------|--------------------|--------------------------------------------|-----------------|-----|-----|
|                           |            |                    |                                            | X               | Y   | Z   |
| Amygdala                  | L          | 7.15 <sup>a</sup>  | 44                                         | -30             | 5   | -18 |
|                           | R          | 8.55 <sup>a</sup>  | 235                                        | 30              | 4   | -20 |
| Dorsomedial PFC           | L          | 8.11               | 81                                         | -4              | 66  | 28  |
| Caudate nucleus           | L          | 7.99               | 49                                         | -15             | -18 | 21  |
| Fusiform gyrus            | L          | 8.49               | 40                                         | -36             | -79 | -12 |
| Frontal operculum         | L          | 9.01               | 50                                         | -51             | 12  | 22  |
| Inferior occipital cortex | L          | 10.27              | 66                                         | -24             | -88 | -5  |
| Mid-occipital cortex      | R          | 7.67               | 31                                         | 40              | -82 | 4   |
| Supplementary motor area  | R          | 9.07               | 163                                        | 9               | -7  | 67  |

Abbreviations: MNI, Montreal Neurological Institute; PFC, prefrontal cortex.

<sup>a</sup>  $p < .05$ , Family-Wise Error (small-volume correction)

Gray matter reductions in all other regions met the criteria of  $p \leq .001$ , uncorrected, for  $\geq 10$  contiguous voxels

**Table S2: Gray matter differences between the early-onset and adolescence-onset CD groups**

| Cerebral regions         | Hemisphere | Local Maxima,<br>Z | Number of significant<br>voxels in cluster | MNI Coordinates |     |     |
|--------------------------|------------|--------------------|--------------------------------------------|-----------------|-----|-----|
|                          |            |                    |                                            | X               | Y   | Z   |
| <i>AO-CD&gt;EO-CD</i>    |            |                    |                                            |                 |     |     |
| Frontal operculum        | L          | 3.41               | 289                                        | -33             | 3   | 27  |
|                          | R          | 3.01               | 13                                         | 52              | 12  | 3   |
| Cerebellum               | L          | 3.09               | 48                                         | -22             | -61 | -32 |
|                          | R          | 3.21               | 104                                        | 3               | -51 | -22 |
| Angular gyrus            | R          | 3.10               | 57                                         | 44              | -74 | 29  |
| <i>EO-CD&gt;AO-CD</i>    |            |                    |                                            |                 |     |     |
| Superior temporal gyrus  | L          | 3.25               | 111                                        | -66             | -26 | 11  |
| Posterior cingulate      | L          | 3.27               | 34                                         | -4              | -58 | 4   |
| Thalamus                 | L          | 3.38               | 252                                        | -10             | -13 | 8   |
| Supplementary motor area | L          | 3.78               | 335                                        | -6              | 11  | 63  |
|                          | R          | 3.87               | 361                                        | 10              | -7  | 69  |
| Precentral gyrus         | R          | 3.24               | 100                                        | 60              | -10 | 42  |
| Postcentral gyrus        | R          | 3.32               | 44                                         | 58              | -24 | 48  |

Abbreviations: AO-CD, adolescence-onset Conduct Disorder; EO-CD, early-onset Conduct Disorder; MNI, Montreal Neurological Institute  
 Gray matter volume reductions in all regions met the criteria of  $p \leq .001$  uncorrected for  $\geq 10$  contiguous voxels

**Table S3: Regions showing significant negative or positive correlations between gray matter volume and lifetime/ever CD symptoms, when considering the CD participants only (n=63)**

| Cerebral regions             | Hemisphere | Local Maxima,<br>Z | Number of significant<br>voxels in cluster | MNI Coordinates |     |     |
|------------------------------|------------|--------------------|--------------------------------------------|-----------------|-----|-----|
|                              |            |                    |                                            | X               | Y   | Z   |
| <i>Negative correlations</i> |            |                    |                                            |                 |     |     |
| Insula                       | R          | 3.57 <sup>a</sup>  | 103                                        | 47              | 1   | 4   |
| Cerebellum                   | L          | 4.04               | 379                                        | -26             | -39 | -36 |
|                              | R          | 3.67               | 763                                        | 22              | -30 | -23 |
|                              | R          | 3.55               | 402                                        | 36              | -61 | -33 |
|                              | R          | 3.13               | 33                                         | 3               | -58 | -27 |
| Inferior temporal gyrus      | L          | 3.51               | 63                                         | -50             | -48 | -9  |
| Posterior cingulate          | R          | 3.39               | 94                                         | 8               | -36 | 30  |
| Inferior frontal gyrus       | R          | 3.19               | 26                                         | 44              | 28  | -8  |
| <i>Positive correlations</i> |            |                    |                                            |                 |     |     |
| Precuneus                    | R          | 3.43               | 117                                        | 10              | -81 | 39  |
| Dorsomedial PFC              | L          | 3.32               | 83                                         | -8              | 56  | 37  |
|                              | R          | 3.53               | 63                                         | 8               | 59  | 36  |

Abbreviations: CD, Conduct Disorder; MNI, Montreal Neurological Institute; PFC, prefrontal cortex

<sup>a</sup> p≤.05, Family-Wise Error (small-volume correction)

Gray matter reductions in all other regions met the criteria of p≤.001 uncorrected for ≥10 contiguous voxels

Supplementary Figure 1

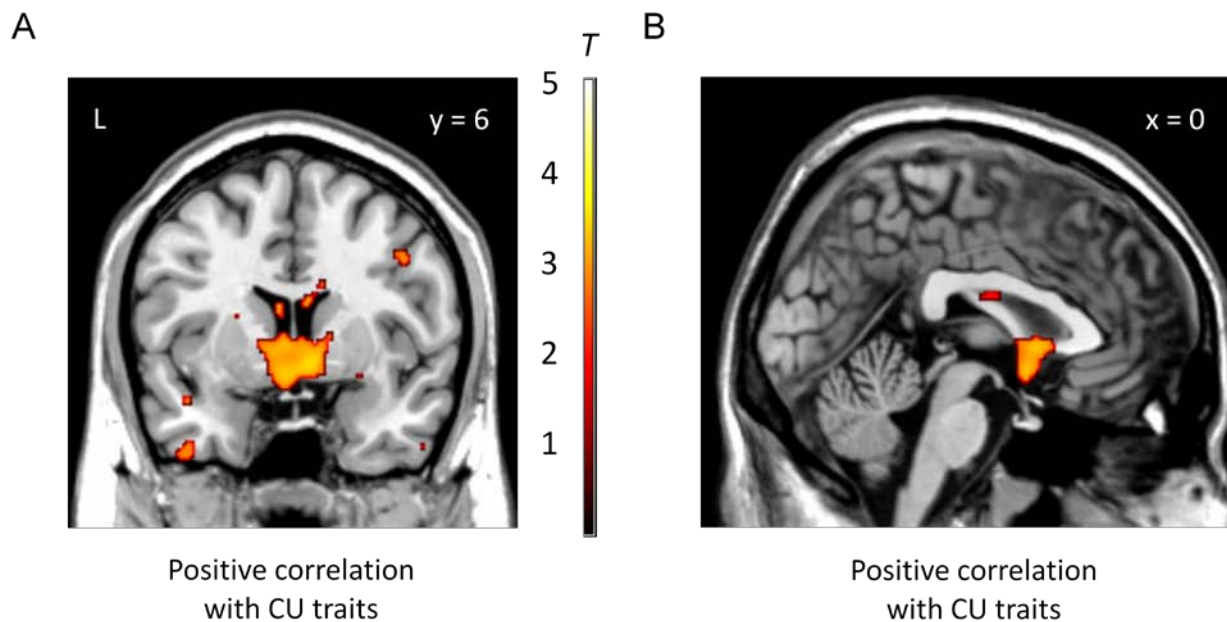

Figure Legend: Panels A and B show the focus of the positive correlation between striatal gray matter volumes and self-reported callous-unemotional traits, when considering the CD participants only ( $n = 63$ ). The images are thresholded at  $p < 0.005$ , uncorrected, for display purposes. The color bar, which ranges from red to white, represents  $t$  statistics. CU traits, callous-unemotional traits.
